# Supplementary material for: HgBr2: an easily growing wide-spectrum birefringent crystal
Source: Royal Society of Chemistry journal article supplement (doi:10.1039/d4sc00836g), 2024-01-01
Supplement: d4sc00836g1.pdf [file d4sc00836g1.pdf]

## Supporting Information

### **HgBr<sub>2</sub>: An Easily Growing Wide-Spectrum Birefringent Crystal**

Ming-Shu Zhang,<sup>a, c</sup> Wen-Dong Yao,<sup>d</sup> Shao-Min Pei,<sup>a</sup> Bin-Wen Liu,<sup>a, b</sup> \* Xiao-Ming Jiang, and Guo-Cong Guo<sup>a, b</sup> \*

<sup>a</sup> State Key Laboratory of Structural Chemistry, Fujian Institute of Research on the Structure of Matter, Chinese Academy of Sciences, Fuzhou, Fujian 350002, P. R. China;

<sup>b</sup> Fujian Science & Technology Innovation Laboratory for Optoelectronic Information of China, Fuzhou, Fujian 350108, P. R. China;

<sup>c</sup> University of Chinese Academy of Sciences, Beijing 100049, P. R. China;

<sup>d</sup> School of Chemistry and Chemical Engineering, Yangzhou University, Yangzhou, Jiangsu 225002, P. R. China.

\*Emails: Guo-Cong Guo: [gcguo@fjirsm.ac.cn](mailto:gcguo@fjirsm.ac.cn); Bin-Wen Liu: [bwliu@fjirsm.ac.cn](mailto:bwliu@fjirsm.ac.cn).

## Contents

|                                                                                                                             |   |
|-----------------------------------------------------------------------------------------------------------------------------|---|
| 1. Experimental section.....                                                                                                | 3 |
| 1.1 Reagents.....                                                                                                           | 3 |
| 1.2 Properties Characterization. ....                                                                                       | 3 |
| 1.3. Computational Method.....                                                                                              | 4 |
| 2. Figures and tables. ....                                                                                                 | 5 |
| 2.1. Figures. ....                                                                                                          | 5 |
| <b>Fig. S1</b> PXRD patterns of the simulated and experimental for HgBr <sub>2</sub> .....                                  | 5 |
| <b>Fig. S2</b> EDS of single crystal HgBr <sub>2</sub> . ....                                                               | 5 |
| <b>2.2. Tables.</b> .....                                                                                                   | 6 |
| <b>Table S1.</b> Crystal data and structure refinement results for HgBr <sub>2</sub> .....                                  | 6 |
| <b>Table S2.</b> Fractional atomic coordinates and equivalent isotropic displacement parameters for HgBr <sub>2</sub> ..... | 7 |
| <b>Table S3.</b> Selected distances (Å) for HgBr <sub>2</sub> . ....                                                        | 7 |
| <b>Table S4.</b> Selected angles (°) for HgBr <sub>2</sub> .....                                                            | 7 |
| 3. References.....                                                                                                          | 8 |

## 1. Experimental section

### 1.1 Reagents.

The reagents utilized in this work were sourced exclusively from commercial suppliers and used without undergoing any additional purification steps. The reagents required for the growth of HgBr<sub>2</sub> crystals were as follows: mercuric bromide powder (99.5%), anhydrous ethanol (99.7%).

### 1.2 Properties Characterization.

The crystallographic data for HgBr<sub>2</sub> were acquired at 297 K using a Rigaku FR-X Microfocus diffractometer equipped with a graphite monochromator Mo-K $\alpha$  radiation ( $\lambda = 0.71073$  Å). Data collection and reduction were executed using CrystalClear software, followed by refinement through full-matrix least-squares on  $F^2$  with the SHELXTL program package.<sup>1-2</sup> Structure determinations relied upon the direct methods, while the face-indexed absorption correction based on utilized XPREP program. The final structure was verified via PLATON analysis to confirm absence of higher symmetries.<sup>3</sup> The powder X-ray diffraction patterns (PXRD) of HgBr<sub>2</sub> were analyzed using a Rigaku MiniFlex 600 diffractometer with Cu-K $\alpha$  radiation at room temperature, scanning the  $2\theta$  range from 5 to 65° with a step size of 0.02°. The experimental PXRD patterns closely matched the calculated patterns generated from CIF data using Mercury software. As depicted in **Fig. S1**, the experimental PXRD pattern of HgBr<sub>2</sub> was basically consistent with the simulated one. Notably, due to the preferred orientation, the diffraction peak intensity of the (002) crystallographic plane at low angle ( $\sim 14^\circ$ ) was significantly higher compared to other planes. Consequently, the diffraction peaks within the  $2\theta$  range from 20° to 65° appeared less prominent; however, their positions align precisely with those predicted by simulation. This observation served as evidence for confirming the purity of our sample. Elemental analysis of HgBr<sub>2</sub> crystal was detected by an energy dispersive X-ray spectroscopy (EDS)-equipped Hitachi S-3500 scanning electron microscope. The EDS results indicated that the average molar ratio of elements was consistent with its chemical formula (Hg : Br = 1 : 1.95, **Fig. S2**). The diffuse-reflectance spectrum of HgBr<sub>2</sub> was acquired at 297 K using a Perkin-Elmer Lambda 900 spectrophotometer with BaSO<sub>4</sub> served as the reference. And such a date was collected within the wavelength range spanning from 200 to 2500 nm. The infrared (IR) spectroscopy data of single-crystal HgBr<sub>2</sub> was carried out within the range of 4000–400 cm<sup>-1</sup> by a Nicolet Magana 750 FT-IR spectrometer. The Raman spectrum of HgBr<sub>2</sub> in the range of 4000–100 cm<sup>-1</sup> was measured using the LABRAM HR Evolution spectrometer with a 532 nm laser as the excitation source. The birefringence of HgBr<sub>2</sub> was performed using a ZEISS Axio Scope. A1 polarizing microscope equipped with a tilting compensator and the light source possessed the 546 nm wavelength. To calculate the birefringence  $\Delta n$ , we utilized the formula  $R = \Delta n \times T$ , where  $R$  represents the optical path difference and  $T$  is the thickness of the crystal.

### 1.3. Computational Method.

The polarizability anisotropy and HOMO-LUMO gap of five linear units ([HgCl<sub>2</sub>] in HgCl<sub>2</sub>, [HgBr<sub>2</sub>] in HgBr<sub>2</sub>, [Hgl<sub>2</sub>] in Hgl<sub>2</sub>, [HgS<sub>2</sub>] in BaHgS<sub>2</sub>, [HgSe<sub>2</sub>] in BaHgSe<sub>2</sub>) were calculated using the Gaussian 09 with def2-QZVPD basis set.<sup>4–6</sup> The aforementioned relevant data of [BS<sub>3</sub>] are cited from the research findings conducted by Prof. Pan et al. on HgB<sub>2</sub>S<sub>4</sub>. The electronic structure of HgBr<sub>2</sub> was computed using ABINIT software based on density functional theory (DFT).<sup>7–8</sup> The exchange correlation functional used in the theoretical calculation was the Perdew-Burke-Ernzerhof (PBE) form of the generalized gradient approximation (GGA).<sup>9</sup> The following orbital electrons were considered as valence electrons: Hg-6s<sup>2</sup>5d<sup>10</sup>, Br-4s<sup>2</sup>4p<sup>5</sup>. The calculation for HgBr<sub>2</sub> was performed using a plane-wave cutoff energy of 18 Hartree (about 500 eV), ensuring convergence in all computations through the implementation of an 8 × 8 × 3 *k*-points sampling. The linear optical properties were assessed through the computation of the complex dielectric function  $\varepsilon(\omega) = \varepsilon_1(\omega) + i\varepsilon_2(\omega)$ . The real component of the dielectric function  $\varepsilon_1$  can be determined via the Kramers-Kronig transform, enabling derivation of the refractive index and calculation of birefringence.

## 2. Figures and tables.

### 2.1. Figures.

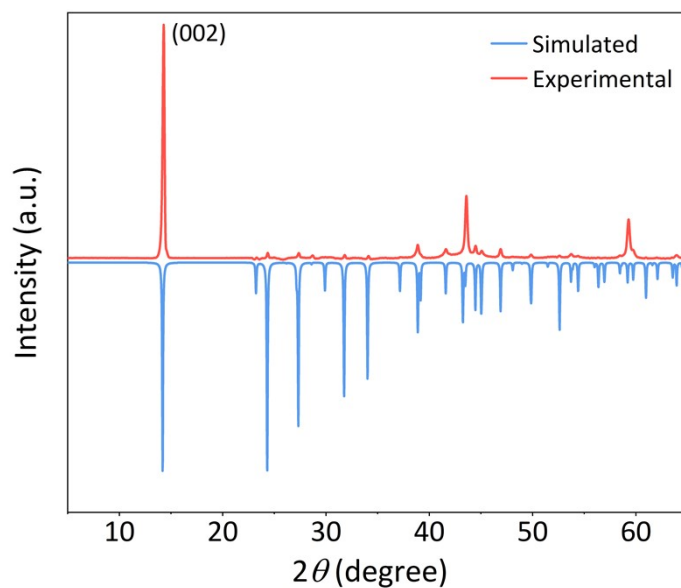

**Fig. S1** PXRD patterns of the simulated and experimental for  $\text{HgBr}_2$ .

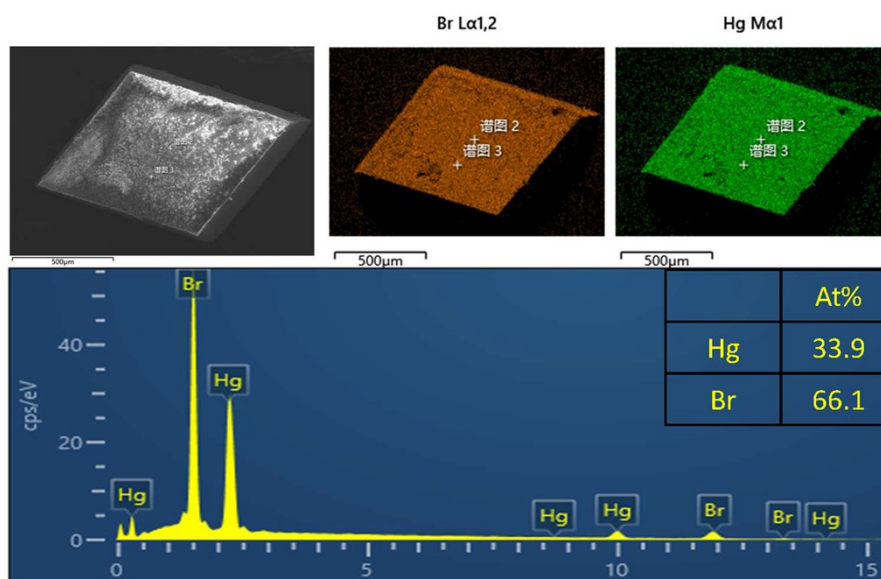

**Fig. S2** EDS of single crystal  $\text{HgBr}_2$ .

## 2.2. Tables.

**Table S1.** Crystal data and structure refinement results for HgBr<sub>2</sub>.

| Empirical formula                                                                                                                                | HgBr <sub>2</sub>         |
|--------------------------------------------------------------------------------------------------------------------------------------------------|---------------------------|
| Fw                                                                                                                                               | 360.41                    |
| Temperature (K)                                                                                                                                  | 293(2)                    |
| Space group                                                                                                                                      | <i>Cmc</i> 2 <sub>1</sub> |
| <i>a</i> (Å)                                                                                                                                     | 4.6215(6)                 |
| <i>b</i> (Å)                                                                                                                                     | 6.7794(7)                 |
| <i>c</i> (Å)                                                                                                                                     | 12.4277(19)               |
| Volume (Å <sup>3</sup> )                                                                                                                         | 389.37(9)                 |
| <i>Z</i>                                                                                                                                         | 4                         |
| <i>D</i> <sub>calcd</sub> (g·cm <sup>-3</sup> )                                                                                                  | 6.148                     |
| $\mu$ (mm <sup>-1</sup> )                                                                                                                        | 59.789                    |
| GOF on <i>F</i> <sup>2</sup>                                                                                                                     | 1.004                     |
| <i>R</i> <sub>1</sub> <sup>a</sup> ( <i>I</i> > 2σ( <i>I</i> ))                                                                                  | 0.0650                    |
| <i>wR</i> <sub>2</sub> <sup>b</sup> ( <i>I</i> > 2σ( <i>I</i> ))                                                                                 | 0.1596                    |
| <i>R</i> <sub>1</sub> <sup>a</sup> (all data)                                                                                                    | 0.0675                    |
| <i>wR</i> <sub>2</sub> <sup>b</sup> (all data)                                                                                                   | 0.1621                    |
| Flack                                                                                                                                            | 0.19(17)                  |
| $\Delta\rho_{\max}/\Delta\rho_{\min}$ (e Å <sup>-3</sup> )                                                                                       | 7.90/−2.06                |
| <sup>a</sup> <i>R</i> = $\sum   F_o  -  F_c   / \sum  F_o $ , <sup>b</sup> <i>wR</i> = $(\sum (w(F_o^2 - F_c^2)^2) / \sum (w(F_o^2)^2))^{1/2}$ . |                           |

**Table S2.** Fractional atomic coordinates and equivalent isotropic displacement parameters for HgBr<sub>2</sub>.

| Atom | x      | y         | z         | U(eq)      | Wyck. |
|------|--------|-----------|-----------|------------|-------|
| Hg1  | 1.0000 | 0.8307(3) | 0.6310(5) | 0.0449(9)  | 4a    |
| Br1  | 1.0000 | 0.5619(8) | 0.7600(4) | 0.0415(15) | 4a    |
| Br2  | 1.0000 | 0.9003(9) | 1.0000(4) | 0.0412(15) | 4a    |

**Table S3.** Selected distances (Å) for HgBr<sub>2</sub>.

| Bond    | Distances | Bond    | Distances |
|---------|-----------|---------|-----------|
| Hg1-Br1 | 2.427(6)  | Hg1-Br2 | 2.445(7)  |

**Table S4.** Selected angles (°) for HgBr<sub>2</sub>.

| Atom-Atom-Atom | Angles    |
|----------------|-----------|
| Br1-Hg1-Br2    | 179.58(3) |

### 3. References

- (1) Rigaku Oxford Diffraction, CrysAlispro Software System, Version V40.67a., Rigaku Corporation, Oxford, UK, 2019.
- (2) Sheldrick, G. M. SHELXS-97, Program for X-Ray Crystal Structure Solution, University of Göttingen, Göttingen, Germany, 1997.
- (3) A. L. Spek, PLATON, a Multipurpose Crystallographic Tool, Utrecht University, Utrecht, Netherlands, 2005.
- (4) M. J. Frisch, G. W. Trucks, H. B. Schlegel, G. E. Scuseria, M. A. Robb, J. R. Cheeseman, G. Scalmani, V. Barone, G. A. Petersson, H. Nakatsuji, X. Li, M. Caricato, A. V. Marenich, J. Bloino, B. G. Janesko, R. Gomperts, B. Mennucci, H. P. Hratchian, J. V. Ortiz, A. F. Izmaylov, J. L. Sonnenberg, D. Williams-Young, F. Ding, F. Lipparini, F. Egidi, J. Goings, B. Peng, A. Petrone, T. Henderson, D. Ranasinghe, V. G. Zakrzewski, J. Gao, N. Rega, G. Zheng, W. Liang, M. Hada, M. Ehara, K. Toyota, R. Fukuda, J. Hasegawa, M. Ishida, T. Nakajima, Y. Honda, O. Kitao, H. Nakai, T. Vreven, K. Throssell, J. A. Montgomery, Jr., J. E. Peralta, F. Ogliaro, M. J. Bearpark, J. J. Heyd, E. N. Brothers, K. N. Kudin, V. N. Staroverov, T. A. Keith, R. Kobayashi, J. Normand, K. Raghavachari, A. P. Rendell, J. C. Burant, S. S. Iyengar, J. Tomasi, M. Cossi, J. M. Millam, M. Klene, C. Adamo, R. Cammi, J. W. Ochterski, R. L. Martin, K. Morokuma, O. Farkas, J. B. Foresman and D. J. Fox, Gaussian 09, Revision E.01., Gaussian Inc., Wallingford CT, 2009.
- (5) T. Lu and F. W. Chen, Multiwfn: A Multifunctional Wavefunction Analyzer, *J. Comput. Chem.*, 2012, **33**, 580–592.
- (6) D. Rappoport and F. Furche, Property-Optimized Gaussian Basis Sets for Molecular Response Calculations, *J. Chem. Phys.*, 2010, **133**, 134105.
- (7) M. C. Payne, M. P. Teter, D. C. Allan, T. A. Arias and J. D. Joannopoulos, Iterative Minimization Techniques for *ab initio* Total-Energy Calculations: Molecular Dynamics and Conjugate Gradients, *Rev. Mod. Phys.*, 1992, **64**, 1045–1097.
- (8) S. J. Clark, M. D. Segall, C. J. Pickard, P. J. Hasnip, M. I. J. Probert, K. Refson and M. C. Payne, First Principles Methods Using CASTEP, *Z. Kristallogr.-Cryst. Mater.*, 2005, **220**, 567–570.
- (9) J. P. Perdew, J. A. Chevary, S. H. Vosko, K. A. Jackson, M. R. Pederson, D. J. Singh and C. Fiolhais, Atoms, Molecules, Solids, and Surfaces: Applications of the Generalized Gradient Approximation for Exchange and Correlation, *Phys. Rev. B*, 1992, **46**, 6671–6687.
